# Supplementary material for: 8-Quinolinolate complexes of yttrium and ytterbium: molecular arrangement and fragmentation under laser impact
Source: Royal Society of Chemistry journal article supplement (doi:10.1039/c3dt51706c), 2013-01-01
Supplement: c3dt51706c.pdf [file c3dt51706c.pdf]

## Electronic Supplementary Information

### 8-Quinolinolate complexes of yttrium and ytterbium: molecular arrangement and fragmentation under laser impact

Evgeny V. Baranov,<sup>\*a</sup> Georgy K. Fukin,<sup>a</sup> Tatyana V. Balashova,<sup>a</sup> Anatoly P. Pushkarev,<sup>a</sup> Ivan D. Grishin,<sup>b</sup> and Mikhail N. Bochkarev<sup>\*a</sup>

<sup>a</sup> G. A. Razuvaev Institute of Organometallic Chemistry of Russian Academy of Sciences, Tropinina 49, 603950 Nizhny Novgorod, Russian Federation.  
Fax: +7 (831) 4627497; Tel: +7 (831) 4627709; E-mail: [mboch@iomc.ras.ru](mailto:mboch@iomc.ras.ru), [bar@iomc.ras.ru](mailto:bar@iomc.ras.ru)

<sup>b</sup> Nizhny Novgorod State University, Gagarina 23/2, 603950 Nizhny Novgorod, Russian Federation.

Table S1. X-ray data collection and refinement parameters for complexes **1** and **2**.

| Complex                                                      | 1                                                                             | 2                                                                                  |
|--------------------------------------------------------------|-------------------------------------------------------------------------------|------------------------------------------------------------------------------------|
| Empirical formula                                            | C <sub>85</sub> H <sub>64</sub> N <sub>9</sub> O <sub>11</sub> Y <sub>3</sub> | C <sub>86</sub> H <sub>66.5</sub> N <sub>9</sub> O <sub>11.5</sub> Yb <sub>3</sub> |
| Formula weight                                               | 1654.18                                                                       | 1929.10                                                                            |
| Temperature (K)                                              | 100(2)                                                                        | 100(2)                                                                             |
| Wavelength (Å)                                               | 0.71073                                                                       | 0.71073                                                                            |
| Crystal system, space group                                  | Monoclinic, P2(1)/n                                                           | Monoclinic, P2(1)/n                                                                |
| Unit cell dimensions                                         |                                                                               |                                                                                    |
| <i>a</i> (Å)                                                 | 16.9402(19)                                                                   | 16.4688(9)                                                                         |
| <i>b</i> (Å)                                                 | 24.619(3)                                                                     | 24.5129(13)                                                                        |
| <i>c</i> (Å)                                                 | 18.248(2)                                                                     | 18.2696(10)                                                                        |
| $\beta$ (°)                                                  | 91.536(2)                                                                     | 91.7790(10)                                                                        |
| Volume (Å <sup>3</sup> )                                     | 7607.7(15)                                                                    | 7371.8(7)                                                                          |
| Z, Calculated density (Mg/m <sup>3</sup> )                   | 4, 1.444                                                                      | 4, 1.738                                                                           |
| Absorption coefficient (mm <sup>-1</sup> )                   | 2.337                                                                         | 3.846                                                                              |
| <i>F</i> (000)                                               | 3368                                                                          | 3790                                                                               |
| Crystal size (mm)                                            | 0.61 × 0.18 × 0.05                                                            | 0.37 × 0.08 × 0.03                                                                 |
| $\theta$ Range for data collection (°)                       | 1.82 – 26.06                                                                  | 1.84 – 27.00                                                                       |
|                                                              | -20 ≤ <i>h</i> ≤ 20                                                           | -21 ≤ <i>h</i> ≤ 21                                                                |
| Limiting indices                                             | -30 ≤ <i>k</i> ≤ 30                                                           | -31 ≤ <i>k</i> ≤ 31                                                                |
|                                                              | -22 ≤ <i>l</i> ≤ 22                                                           | -23 ≤ <i>l</i> ≤ 23                                                                |
| Reflections collected/unique [ <i>R</i> <sub>int</sub> ]     | 63970 / 14889 [0.1564]                                                        | 67420 / 16015 [0.0552]                                                             |
| Completeness                                                 | 0.99 (to $\theta = 26.06^\circ$ )                                             | 99.6 (to $\theta = 27.00^\circ$ )                                                  |
| Max. and min. transmission                                   | 0.8921, 0.3298                                                                | 0.8933, 0.3303                                                                     |
| Refinement method                                            | full-matrix least-squares on <i>F</i> <sup>2</sup>                            | full-matrix least-squares on <i>F</i> <sup>2</sup>                                 |
| Data / restraints / parameters                               | 14889 / 177 / 1063                                                            | 16015 / 344 / 1315                                                                 |
| Goodness-of-fit on <i>F</i> <sup>2</sup>                     | 1.017                                                                         | 1.016                                                                              |
| Final <i>R</i> indices [ <i>I</i> > 2 $\sigma$ ( <i>I</i> )] | <i>R</i> 1 = 0.0827, <i>wR</i> 2 = 0.1815                                     | <i>R</i> 1 = 0.0397, <i>wR</i> 2 = 0.0811                                          |
| <i>R</i> indices (all data)                                  | <i>R</i> 1 = 0.1904, <i>wR</i> 2 = 0.2285                                     | <i>R</i> 1 = 0.0697, <i>wR</i> 2 = 0.0876                                          |
| Largest diff. peak and hole (eÅ <sup>-3</sup> )              | 1.406, -0.825                                                                 | 2.229, -1.220                                                                      |

Table S2. Selected bond lengths and angles in **1** (Ln=Y) and **2** (Ln=Yb).

| Bond        | <i>d</i> , Å |           | Angle             | <i>ω</i> , ° |           |
|-------------|--------------|-----------|-------------------|--------------|-----------|
|             | 1            | 2         |                   | 1            | 2         |
| Ln(1)-O(1A) | 2.336(3)     | 2.299(2)  | N(1I)-Ln(1)-O(1I) | 64.94(17)    | 66.99(15) |
| Ln(1)-O(1B) | 2.300(3)     | 2.261(2)  | O(1A)-Ln(1)-O(1B) | 76.04(12)    | 76.03(8)  |
| Ln(1)-O(1C) | 2.474(3)     | 2.453(2)  | O(1B)-Ln(1)-O(1C) | 69.07(11)    | 68.63(7)  |
| Ln(1)-O(1E) | 2.316(3)     | 2.276(2)  | O(1C)-Ln(1)-O(1A) | 64.05(11)    | 64.00(7)  |
| Ln(1)-O(1F) | 2.330(4)     | 2.307(2)  | O(1E)-Ln(1)-O(1F) | 76.24(12)    | 75.84(8)  |
| Ln(1)-O(1G) | 2.465(3)     | 2.430(2)  | O(1F)-Ln(1)-O(1G) | 64.33(12)    | 64.16(8)  |
| Ln(1)-O(1I) | 2.301(5)     | 2.236(4)  | O(1G)-Ln(1)-O(1E) | 69.10(12)    | 68.29(8)  |
| Ln(1)-N(1I) | 2.644(4)     | 2.587(5)  | N(1A)-Ln(2)-O(1A) | 67.42(14)    | 68.27(9)  |
|             |              |           | N(1B)-Ln(2)-O(1B) | 65.52(12)    | 66.56(8)  |
| Ln(2)-O(1A) | 2.350(3)     | 2.332(2)  | N(1C)-Ln(2)-O(1C) | 66.60(13)    | 68.04(8)  |
| Ln(2)-O(1B) | 2.322(3)     | 2.286(2)  | N(1D)-Ln(2)-O(1D) | 69.12(13)    | 70.70(19) |
| Ln(2)-O(1C) | 2.342(3)     | 2.307(2)  | O(1A)-Ln(2)-O(1B) | 75.35(12)    | 74.92(8)  |
| Ln(2)-O(1D) | 2.240(4)     | 2.038(8)  | O(1B)-Ln(2)-O(1C) | 71.04(11)    | 70.85(8)  |
| Ln(2)-N(1A) | 2.504(5)     | 2.448(3)  | O(1C)-Ln(2)-O(1A) | 65.96(11)    | 65.86(8)  |
| Ln(2)-N(1B) | 2.555(4)     | 2.527(3)  | N(1E)-Ln(3)-O(1E) | 65.43(13)    | 67.10(9)  |
| Ln(2)-N(1C) | 2.502(4)     | 2.457(3)  | N(1F)-Ln(3)-O(1F) | 67.32(15)    | 68.77(10) |
| Ln(2)-N(1D) | 2.493(4)     | 2.469(5)  | N(1G)-Ln(3)-O(1G) | 67.15(14)    | 68.62(9)  |
|             |              |           | N(1H)-Ln(3)-O(1H) | 69.10(14)    | 72.46(13) |
| Ln(3)-O(1E) | 2.331(3)     | 2.295(2)  | O(1E)-Ln(3)-O(1F) | 75.40(12)    | 75.39(8)  |
| Ln(3)-O(1F) | 2.359(4)     | 2.311(2)  | O(1F)-Ln(3)-O(1G) | 66.19(13)    | 66.18(8)  |
| Ln(3)-O(1G) | 2.320(4)     | 2.301(2)  | O(1G)-Ln(3)-O(1E) | 71.41(12)    | 70.26(8)  |
| Ln(3)-O(1H) | 2.247(4)     | 2.163(4)  |                   |              |           |
| Ln(3)-N(1E) | 2.549(4)     | 2.511(3)  | Ln(2)-O(1A)-Ln(1) | 96.62(12)    | 96.65(8)  |
| Ln(3)-N(1F) | 2.481(5)     | 2.438(3)  | Ln(2)-O(1B)-Ln(1) | 98.42(12)    | 99.06(8)  |
| Ln(3)-N(1G) | 2.484(5)     | 2.419(3)  | Ln(2)-O(1C)-Ln(1) | 93.17(11)    | 93.20(7)  |
| Ln(3)-N(1H) | 2.491(4)     | 2.487(4)  | Ln(1)-O(1E)-Ln(3) | 97.57(12)    | 98.33(8)  |
|             |              |           | Ln(1)-O(1F)-Ln(3) | 96.40(13)    | 96.98(8)  |
| Ln(1)-Ln(2) | 3.4994(8)    | 3.4594(3) | Ln(1)-O(1G)-Ln(3) | 93.81(13)    | 93.88(8)  |
| Ln(1)-Ln(3) | 3.4957(9)    | 3.4578(3) |                   |              |           |
|             |              |           | Ln(2)-Ln(1)-Ln(3) | 139.87(2)    | 140.32(1) |

Table S3. X-ray and DFT (B3LYP/DZVP level) distances and angles in complex 1.

| Bond        | <i>d</i> , Å |        | Angle             | <i>ω</i> , ° |        |
|-------------|--------------|--------|-------------------|--------------|--------|
|             | Xray         | DFT    |                   | Xray         | DFT    |
| Ln(1)-O(1A) | 2.336(3)     | 2.420  | N(1I)-Ln(1)-O(1I) | 64.94(17)    | 65.63  |
| Ln(1)-O(1B) | 2.300(3)     | 2.390  | O(1A)-Ln(1)-O(1B) | 76.04(12)    | 76.60  |
| Ln(1)-O(1C) | 2.474(3)     | 2.535  | O(1B)-Ln(1)-O(1C) | 69.07(11)    | 67.74  |
| Ln(1)-O(1E) | 2.316(3)     | 2.404  | O(1C)-Ln(1)-O(1A) | 64.05(11)    | 62.99  |
| Ln(1)-O(1F) | 2.330(4)     | 2.431  | O(1E)-Ln(1)-O(1F) | 76.24(12)    | 72.36  |
| Ln(1)-O(1G) | 2.465(3)     | 2.463  | O(1F)-Ln(1)-O(1G) | 64.33(12)    | 63.58  |
| Ln(1)-O(1I) | 2.301(5)     | 2.253  | O(1G)-Ln(1)-O(1E) | 69.10(12)    | 71.29  |
| Ln(1)-N(1I) | 2.644(4)     | 2.666  | N(1A)-Ln(2)-O(1A) | 67.42(14)    | 66.43  |
|             |              |        | N(1B)-Ln(2)-O(1B) | 65.52(12)    | 65.56  |
| Ln(2)-O(1A) | 2.350(3)     | 2.415  | N(1C)-Ln(2)-O(1C) | 66.60(13)    | 67.15  |
| Ln(2)-O(1B) | 2.322(3)     | 2.365  | N(1D)-Ln(2)-O(1D) | 69.12(13)    | 67.55  |
| Ln(2)-O(1C) | 2.342(3)     | 2.361  | O(1A)-Ln(2)-O(1B) | 75.35(12)    | 77.17  |
| Ln(2)-O(1D) | 2.240(4)     | 2.298  | O(1B)-Ln(2)-O(1C) | 71.04(11)    | 71.10  |
| Ln(2)-N(1A) | 2.504(5)     | 2.545  | O(1C)-Ln(2)-O(1A) | 65.96(11)    | 65.68  |
| Ln(2)-N(1B) | 2.555(4)     | 2.586  | N(1E)-Ln(3)-O(1E) | 65.43(13)    | 65.23  |
| Ln(2)-N(1C) | 2.502(4)     | 2.531  | N(1F)-Ln(3)-O(1F) | 67.32(15)    | 66.66  |
| Ln(2)-N(1D) | 2.493(4)     | 2.540  | N(1G)-Ln(3)-O(1G) | 67.15(14)    | 66.62  |
|             |              |        | N(1H)-Ln(3)-O(1H) | 69.10(14)    | 67.97  |
| Ln(3)-O(1E) | 2.331(3)     | 2.406  | O(1E)-Ln(3)-O(1F) | 75.40(12)    | 73.48  |
| Ln(3)-O(1F) | 2.359(4)     | 2.365  | O(1F)-Ln(3)-O(1G) | 66.19(13)    | 66.01  |
| Ln(3)-O(1G) | 2.320(4)     | 2.369  | O(1G)-Ln(3)-O(1E) | 71.41(12)    | 72.89  |
| Ln(3)-O(1H) | 2.247(4)     | 2.296  |                   |              |        |
| Ln(3)-N(1E) | 2.549(4)     | 2.587  | Ln(2)-O(1A)-Ln(1) | 96.62(12)    | 95.84  |
| Ln(3)-N(1F) | 2.481(5)     | 2.549  | Ln(2)-O(1B)-Ln(1) | 98.42(12)    | 97.97  |
| Ln(3)-N(1G) | 2.484(5)     | 2.544  | Ln(2)-O(1C)-Ln(1) | 93.17(11)    | 94.19  |
| Ln(3)-N(1H) | 2.491(4)     | 2.524  | Ln(1)-O(1E)-Ln(3) | 97.57(12)    | 96.96  |
|             |              |        | Ln(1)-O(1F)-Ln(3) | 96.40(13)    | 97.33  |
| Ln(1)-Ln(2) | 3.4994(8)    | 3.5884 | Ln(1)-O(1G)-Ln(3) | 93.81(13)    | 96.35  |
| Ln(1)-Ln(3) | 3.4957(9)    | 3.6015 |                   |              |        |
|             |              |        | Ln(2)-Ln(1)-Ln(3) | 139.87(2)    | 138.71 |

Table S4. Main topological parameters of Y-N and Y-O bonds in complex **1**.

| <b>Bond</b> | <b>distance, Å</b> | $\rho(\mathbf{r})$ | $\nabla^2\rho(\mathbf{r})$ | $h_e(\mathbf{r})$ | $v(\mathbf{r})$ |
|-------------|--------------------|--------------------|----------------------------|-------------------|-----------------|
| Ln(1)-O(1A) | 2.420              | 0.0399             | 0.1803                     | 0.0021            | -0.0409         |
| Ln(1)-O(1B) | 2.390              | 0.0433             | 0.1948                     | 0.0016            | -0.0455         |
| Ln(1)-O(1C) | 2.535              | 0.0301             | 0.1370                     | 0.0032            | -0.0278         |
| Ln(1)-O(1E) | 2.404              | 0.0413             | 0.1911                     | 0.0021            | -0.0436         |
| Ln(1)-O(1F) | 2.431              | 0.0389             | 0.1754                     | 0.0023            | -0.0393         |
| Ln(1)-O(1G) | 2.463              | 0.0358             | 0.1634                     | 0.0027            | -0.0354         |
| Ln(1)-O(1I) | 2.253              | 0.0624             | 0.2648                     | -0.0041           | -0.0743         |
| Ln(1)-N(1I) | 2.666              | 0.0287             | 0.1026                     | 0.0015            | -0.0226         |
|             |                    |                    |                            |                   |                 |
| Ln(2)-O(1A) | 2.415              | 0.0429             | 0.1845                     | 0.0011            | -0.0439         |
| Ln(2)-O(1B) | 2.365              | 0.0480             | 0.2097                     | -0.00002          | -0.0525         |
| Ln(2)-O(1C) | 2.361              | 0.0489             | 0.2092                     | -0.0003           | -0.0528         |
| Ln(2)-O(1D) | 2.298              | 0.0568             | 0.2408                     | -0.0025           | -0.0652         |
| Ln(2)-N(1A) | 2.545              | 0.0376             | 0.1321                     | -0.00006          | -0.0332         |
| Ln(2)-N(1B) | 2.586              | 0.0342             | 0.1221                     | 0.0007            | -0.0290         |
| Ln(2)-N(1C) | 2.531              | 0.0387             | 0.1362                     | -0.0003           | -0.0346         |
| Ln(2)-N(1D) | 2.540              | 0.0381             | 0.1342                     | -0.0002           | -0.0339         |
|             |                    |                    |                            |                   |                 |
| Ln(3)-O(1E) | 2.406              | 0.0436             | 0.1909                     | 0.0010            | -0.0458         |
| Ln(3)-O(1F) | 2.365              | 0.0483             | 0.2074                     | -0.00004          | -0.0519         |
| Ln(3)-O(1G) | 2.369              | 0.0479             | 0.2056                     | 0.00002           | -0.0514         |
| Ln(3)-O(1H) | 2.296              | 0.0572             | 0.2412                     | -0.0026           | -0.0655         |
| Ln(3)-N(1E) | 2.587              | 0.0342             | 0.1224                     | 0.0007            | -0.0291         |
| Ln(3)-N(1F) | 2.549              | 0.0372             | 0.1312                     | 0.00003           | -0.0328         |
| Ln(3)-N(1G) | 2.544              | 0.0378             | 0.1327                     | -0.0001           | -0.0334         |
| Ln(3)-N(1H) | 2.524              | 0.0395             | 0.1381                     | -0.0005           | -0.0354         |

Table S5. Optimized Cartesians of the computed minima of complex 1.

**COORDINATES OF ALL ATOMS ARE (ANGS)**

| <b>ATOM</b> | <b>CHARGE</b> | <b>X</b>      | <b>Y</b>      | <b>Z</b>      |
|-------------|---------------|---------------|---------------|---------------|
| Y           | 39            | -0.0174475606 | -0.0286495174 | -0.1791325599 |
| Y           | 39            | -3.3114258376 | 1.3607518674  | 0.1307346992  |
| Y           | 39            | 3.4035061075  | 1.0972049069  | -0.1978241340 |
| O           | 8             | -2.0181535035 | -0.4204370973 | 1.1244660378  |
| N           | 7             | -4.5492502413 | -0.8610225202 | 0.2326523306  |
| C           | 6             | -5.7663008774 | -1.0852572803 | -0.2448088877 |
| H           | 1             | -6.1847600106 | -0.3120462356 | -0.8829338078 |
| C           | 6             | -6.5129406053 | -2.2441737474 | 0.0627572989  |
| H           | 1             | -7.5012339770 | -2.3756629319 | -0.3692763995 |
| C           | 6             | -5.9745283859 | -3.1723143772 | 0.9299856035  |
| H           | 1             | -6.5334570643 | -4.0647302822 | 1.2063826305  |
| C           | 6             | -4.6841448404 | -2.9631443863 | 1.4801745547  |
| C           | 6             | -3.9845154706 | -1.7839880859 | 1.0702289649  |
| C           | 6             | -2.6583494125 | -1.5094850633 | 1.5591202786  |
| C           | 6             | -2.1275423125 | -2.3882784193 | 2.5017102057  |
| H           | 1             | -1.1404869011 | -2.1894372497 | 2.9059438082  |
| C           | 6             | -2.8314557740 | -3.5428498167 | 2.9148144280  |
| H           | 1             | -2.3627186150 | -4.2060743325 | 3.6388834657  |
| C           | 6             | -4.0807811556 | -3.8477730549 | 2.4124651253  |
| H           | 1             | -4.6100446259 | -4.7456085758 | 2.7228099455  |
| O           | 8             | -1.7626042836 | 0.8223389794  | -1.5737249347 |
| N           | 7             | -4.2689050591 | 1.4994132949  | -2.2678992433 |
| C           | 6             | -5.4970350762 | 1.8822197350  | -2.5997480471 |
| H           | 1             | -6.1217528753 | 2.2143778485  | -1.7733891536 |
| C           | 6             | -5.9771714192 | 1.8508299860  | -3.9296456732 |
| H           | 1             | -6.9916682849 | 2.1795883369  | -4.1393122011 |
| C           | 6             | -5.1456707064 | 1.3955848570  | -4.9327190557 |
| H           | 1             | -5.4899443603 | 1.3537871505  | -5.9648109551 |

|   |   |               |               |               |
|---|---|---------------|---------------|---------------|
| C | 6 | -3.8262174788 | 0.9756520446  | -4.6227003588 |
| C | 6 | -3.4255176440 | 1.0559352268  | -3.2512653770 |
| C | 6 | -2.0984795804 | 0.6720155859  | -2.8504384468 |
| C | 6 | -1.2302291442 | 0.2072081460  | -3.8379315262 |
| H | 1 | -0.2296090784 | -0.1016189370 | -3.5528823076 |
| C | 6 | -1.6388559439 | 0.1195912617  | -5.1877840860 |
| H | 1 | -0.9286492984 | -0.2538677036 | -5.9230929217 |
| C | 6 | -2.9069504564 | 0.4946754370  | -5.5919756776 |
| H | 1 | -3.2091731898 | 0.4283983523  | -6.6345011728 |
| O | 8 | -1.1499410577 | 2.0025755870  | 0.8309667423  |
| N | 7 | -3.0019456783 | 3.8726544482  | 0.1871111806  |
| C | 6 | -3.9160301413 | 4.7751783912  | -0.1469345341 |
| H | 1 | -4.8263764556 | 4.3918632453  | -0.6007792426 |
| C | 6 | -3.7523440291 | 6.1573940031  | 0.0933539040  |
| H | 1 | -4.5340745945 | 6.8500156313  | -0.2065896172 |
| C | 6 | -2.6059374399 | 6.5920822933  | 0.7271194505  |
| H | 1 | -2.4573110140 | 7.6491188086  | 0.9418367485  |
| C | 6 | -1.6106694133 | 5.6591418784  | 1.1152396530  |
| C | 6 | -1.8511372991 | 4.2835875300  | 0.8026844585  |
| C | 6 | -0.8880572970 | 3.2652248263  | 1.1470657582  |
| C | 6 | 0.2603289672  | 3.6785852159  | 1.8239914087  |
| H | 1 | 0.9923999319  | 2.9324744373  | 2.1059441285  |
| C | 6 | 0.4840090223  | 5.0378425608  | 2.1392082682  |
| H | 1 | 1.3986427435  | 5.3043817023  | 2.6655391813  |
| C | 6 | -0.4190876526 | 6.0250499712  | 1.7945960466  |
| H | 1 | -0.2346910286 | 7.0693783638  | 2.0355000255  |
| O | 8 | -5.4827884892 | 2.0706253895  | 0.3773164040  |
| N | 7 | -3.9385710205 | 1.7373739980  | 2.5631013768  |
| C | 6 | -3.1521371440 | 1.5873550696  | 3.6205715869  |
| H | 1 | -2.1339251149 | 1.2666178441  | 3.4178236572  |
| C | 6 | -3.5951975540 | 1.8342154842  | 4.9401722742  |

|   |   |               |               |               |
|---|---|---------------|---------------|---------------|
| H | 1 | -2.9067539696 | 1.6990188068  | 5.7699882282  |
| C | 6 | -4.8968018841 | 2.2456317745  | 5.1452468644  |
| H | 1 | -5.2642910642 | 2.4404022070  | 6.1515633878  |
| C | 6 | -5.7699668623 | 2.4228724623  | 4.0393487594  |
| C | 6 | -5.2290324119 | 2.1540631504  | 2.7440507055  |
| C | 6 | -6.0264737759 | 2.3169642874  | 1.5487719308  |
| C | 6 | -7.3506445865 | 2.7415771769  | 1.7224544269  |
| H | 1 | -7.9724394592 | 2.8710713924  | 0.8391506612  |
| C | 6 | -7.8786959883 | 2.9987852913  | 3.0076908520  |
| H | 1 | -8.9139921952 | 3.3257570517  | 3.0891785134  |
| C | 6 | -7.1200534123 | 2.8492356469  | 4.1563482345  |
| H | 1 | -7.5385078333 | 3.0536112188  | 5.1389961662  |
| O | 8 | 1.7127166941  | 0.4955193992  | 1.4053239023  |
| N | 7 | 4.1151132634  | 1.3532846723  | 2.2756474744  |
| C | 6 | 5.3094485655  | 1.7612914731  | 2.6906142065  |
| H | 1 | 6.0310389959  | 1.9695504717  | 1.9035406041  |
| C | 6 | 5.6342992778  | 1.9152949434  | 4.0585601253  |
| H | 1 | 6.6294879376  | 2.2522824360  | 4.3361754098  |
| C | 6 | 4.6772268586  | 1.6354539818  | 5.0120421150  |
| H | 1 | 4.8982753185  | 1.7475152536  | 6.0721468891  |
| C | 6 | 3.3881026124  | 1.1952388928  | 4.6130284070  |
| C | 6 | 3.1542403198  | 1.0646059132  | 3.2079484307  |
| C | 6 | 1.8763187190  | 0.6175187743  | 2.7167924087  |
| C | 6 | 0.8815019872  | 0.3343323239  | 3.6539651275  |
| H | 1 | -0.0909920177 | 0.0089617198  | 3.2960599505  |
| C | 6 | 1.1230180163  | 0.4678567604  | 5.0404210775  |
| H | 1 | 0.3189929493  | 0.2310185574  | 5.7345316392  |
| C | 6 | 2.3466340198  | 0.8865237865  | 5.5284464940  |
| H | 1 | 2.5231808400  | 0.9847177265  | 6.5968496769  |
| O | 8 | 2.1127402604  | -0.6163016419 | -1.1930377568 |
| N | 7 | 4.5981095156  | -1.1531590862 | -0.2724871232 |

|   |   |               |               |               |
|---|---|---------------|---------------|---------------|
| C | 6 | 5.8088479304  | -1.4101056174 | 0.2057724260  |
| H | 1 | 6.2555550016  | -0.6375506673 | 0.8264149427  |
| C | 6 | 6.5147689745  | -2.5983816077 | -0.0871997240 |
| H | 1 | 7.5007818869  | -2.7559238259 | 0.3414081100  |
| C | 6 | 5.9411737028  | -3.5230995025 | -0.9367194601 |
| H | 1 | 6.4687961782  | -4.4388498177 | -1.1981469737 |
| C | 6 | 4.6573993535  | -3.2795592498 | -1.4884450919 |
| C | 6 | 4.0034198307  | -2.0669355983 | -1.1008513913 |
| C | 6 | 2.6922687674  | -1.7470087800 | -1.5997334196 |
| C | 6 | 2.1124966732  | -2.6276342983 | -2.5106855834 |
| H | 1 | 1.1263896582  | -2.3972231291 | -2.8999953404 |
| C | 6 | 2.7691629171  | -3.8197565575 | -2.8950060917 |
| H | 1 | 2.2664797704  | -4.4860026989 | -3.5928739691 |
| C | 6 | 4.0127096094  | -4.1596493239 | -2.3973244726 |
| H | 1 | 4.5045694430  | -5.0837633162 | -2.6919917973 |
| O | 8 | 1.3263066011  | 1.8362519115  | -1.0647236092 |
| N | 7 | 3.2372395185  | 3.6274842516  | -0.4005160343 |
| C | 6 | 4.1776759103  | 4.4965266208  | -0.0499423612 |
| H | 1 | 5.0249816590  | 4.0922719270  | 0.4977298404  |
| C | 6 | 4.1225797922  | 5.8664997496  | -0.3887399659 |
| H | 1 | 4.9218972779  | 6.5299619088  | -0.0699098461 |
| C | 6 | 3.0588780085  | 6.3251649370  | -1.1394005047 |
| H | 1 | 2.9958354768  | 7.3722871533  | -1.4310572245 |
| C | 6 | 2.0376339616  | 5.4294021835  | -1.5451555050 |
| C | 6 | 2.1655116795  | 4.0660142883  | -1.1297083111 |
| C | 6 | 1.1647175589  | 3.0915422112  | -1.4801236819 |
| C | 6 | 0.0923698636  | 3.5215634551  | -2.2596512106 |
| H | 1 | -0.6691855577 | 2.8029635908  | -2.5349980227 |
| C | 6 | -0.0199229096 | 4.8681359233  | -2.6753539509 |
| H | 1 | -0.8791983189 | 5.1537391608  | -3.2790902977 |
| C | 6 | 0.9215042663  | 5.8188726619  | -2.3313917392 |



|   |   |               |               |               |
|---|---|---------------|---------------|---------------|
| H | 1 | 0.8226602674  | 6.8536905290  | -2.6509332734 |
| O | 8 | 5.6126819837  | 1.7185623134  | -0.2818941643 |
| N | 7 | 4.2298085134  | 1.3377584388  | -2.5709199573 |
| C | 6 | 3.5267891898  | 1.1500155520  | -3.6802131365 |
| H | 1 | 2.4894679535  | 0.8535123134  | -3.5467282205 |
| C | 6 | 4.0799602046  | 1.3240225095  | -4.9694661630 |
| H | 1 | 3.4580019222  | 1.1581112890  | -5.8448436196 |
| C | 6 | 5.4022631839  | 1.7022190671  | -5.0867886495 |
| H | 1 | 5.8532339864  | 1.8415771171  | -6.0680051613 |
| C | 6 | 6.1888333983  | 1.9141869828  | -3.9232118524 |
| C | 6 | 5.5415565830  | 1.7157766191  | -2.6648334873 |
| C | 6 | 6.2494304583  | 1.9079064594  | -1.4185187068 |
| C | 6 | 7.5932893920  | 2.2940344873  | -1.5046594883 |
| H | 1 | 8.1486581942  | 2.4440064242  | -0.5811842409 |
| C | 6 | 8.2256387484  | 2.4868513068  | -2.7539286954 |
| H | 1 | 9.2721599094  | 2.7867197745  | -2.7671517887 |
| C | 6 | 7.5542557965  | 2.3058155708  | -3.9509716358 |
| H | 1 | 8.0521416291  | 2.4592140698  | -4.9054250700 |
| O | 8 | -0.8332922902 | -1.7733963401 | -1.3475810946 |
| N | 7 | 0.6540853187  | -2.4169031162 | 0.7972969581  |
| C | 6 | 1.4589301932  | -2.7341643981 | 1.8036941682  |
| H | 1 | 1.9417049006  | -1.9114625530 | 2.3211029147  |
| C | 6 | 1.6937614734  | -4.0661265058 | 2.2169474740  |
| H | 1 | 2.3654539767  | -4.2550411760 | 3.0504593408  |
| C | 6 | 1.0615157441  | -5.0965968662 | 1.5512639964  |
| H | 1 | 1.2168511778  | -6.1318274449 | 1.8515210879  |
| C | 6 | 0.2077263197  | -4.8084395512 | 0.4556740771  |
| C | 6 | 0.0473746605  | -3.4298506355 | 0.1074908548  |
| C | 6 | -0.7615242199 | -3.0397037102 | -1.0242387634 |
| C | 6 | -1.4123983036 | -4.0597336196 | -1.7320236381 |
| H | 1 | -2.0319585673 | -3.7807094752 | -2.5809723873 |

|   |   |               |               |               |
|---|---|---------------|---------------|---------------|
| C | 6 | -1.2645212456 | -5.4147551899 | -1.3640898535 |
| H | 1 | -1.7890062414 | -6.1726339534 | -1.9441680551 |
| C | 6 | -0.4694015390 | -5.8033104649 | -0.2984095745 |
| H | 1 | -0.3544046674 | -6.8518370793 | -0.0333877949 |
